# Supplementary material for: Campylobacter novaezeelandiae sp. nov., isolated from birds and water in New Zealand
Source: PubMed Central journal article supplement — Int J Syst Evol Microbiol. 2020 Jun 5;70(6):3775–84. doi: 10.1099/ijsem.0.004231 (PMC7395618; doi:10.1099/ijsem.0.004231), 2020-06-05
Supplement: ijsem-70-3775-s001.pdf [file ijsem-70-3775-s001.pdf]

**Table S1.** List of bacterial strains and their genome accession numbers used to calculate average nucleotide identities

| Bacterial strain                                                                    | NCBI genome assembly identifier |
|-------------------------------------------------------------------------------------|---------------------------------|
| <i>Arcobacter butzleri</i> RM4018 <sup>T</sup>                                      | GCF_000014025.1                 |
| <i>Campylobacter armoricus</i> CA656 <sup>T</sup>                                   | GCF_006176165.1                 |
| <i>Campylobacter avium</i> LMG 24591 <sup>T</sup>                                   | GCF_002238335.1                 |
| <i>Campylobacter blaseri</i> 17S00004-5 <sup>T</sup>                                | GCF_003015205.1                 |
| <i>Campylobacter coli</i> CCUG 11283 <sup>T</sup>                                   | GCF_008802085.1                 |
| <i>Campylobacter concisus</i> ATCC 33237 <sup>T</sup>                               | GCF_001298465.1                 |
| <i>Campylobacter corcagiensis</i> CIT 045 <sup>T</sup>                              | GCF_000597805.1                 |
| <i>Campylobacter cuniculorum</i> DSM 23162 = LMG 24588 <sup>T</sup>                 | GCF_002104335.1                 |
| <i>Campylobacter curvus</i> DSM 6644 <sup>T</sup>                                   | GCF_000376325.1                 |
| <i>Campylobacter fetus</i> ATCC 27374 <sup>T</sup>                                  | GCF_001816265.1                 |
| <i>Campylobacter geochelonis</i> RC20 <sup>T</sup>                                  | GCF_900063025.1                 |
| <i>Campylobacter gracilis</i> ATCC 33236 <sup>T</sup>                               | GCF_001190745.1                 |
| <i>Campylobacter helveticus</i> ATCC 51209 <sup>T</sup>                             | GCF_002080395.1                 |
| <i>Campylobacter hepaticus</i> HV10 <sup>T</sup>                                    | GCF_001687475.2                 |
| <i>Campylobacter hominis</i> ATCC BAA-381                                           | GCF_000017585.1                 |
| <i>Campylobacter hyointestinalis</i> ATCC 35217 <sup>T</sup>                        | GCF_900116585.1                 |
| <i>Campylobacter iguaniorum</i> 1485E <sup>T</sup>                                  | GCF_000736415.1                 |
| <i>Campylobacter insulaenigrae</i> NCTC 12927                                       | GCF_000816185.1                 |
| <i>Campylobacter jejuni</i> subsp. <i>jejuni</i> ATCC 33560 <sup>T</sup>            | GCF_003999645.1                 |
| <i>Campylobacter lanienae</i> NCTC 13004 <sup>T</sup>                               | GCF_002139935.1                 |
| <i>Campylobacter lari</i> ATCC 35221 <sup>T</sup>                                   | GCF_900111465.1                 |
| <i>Campylobacter ornithocola</i> WBE38 <sup>T</sup>                                 | GCF_001705345.1                 |
| <i>Campylobacter peloridis</i> LMG 23910 <sup>T</sup>                               | GCF_000816785.1                 |
| <i>Campylobacter pinnipediorum</i> subsp. <i>pinnipediorum</i> RM17260 <sup>T</sup> | GCF_002021925.1                 |
| <i>Campylobacter rectus</i> RM3267                                                  | GCF_000174175.1                 |
| <i>Campylobacter showae</i> CSUNSWCD                                                | GCF_000313615.1                 |
| <i>Campylobacter sputorum</i> bv. <i>sputorum</i> LMG 7795 <sup>T</sup>             | GCF_008245005.1                 |
| <i>Campylobacter subantarcticus</i> LMG 24377 <sup>T</sup>                          | GCF_000816305.1                 |
| <i>Campylobacter upsaliensis</i> DSM 5365 <sup>T</sup>                              | GCF_000620965.1                 |
| <i>Campylobacter ureolyticus</i> DSM 20703 <sup>T</sup>                             | GCF_000374605.1                 |
| <i>Campylobacter volucris</i> LMG 24380 <sup>T</sup>                                | GCF_008245045.1                 |
| <i>Campylobacter troglodytis</i> MIT 05-9149A                                       | GCF_006864425.1                 |

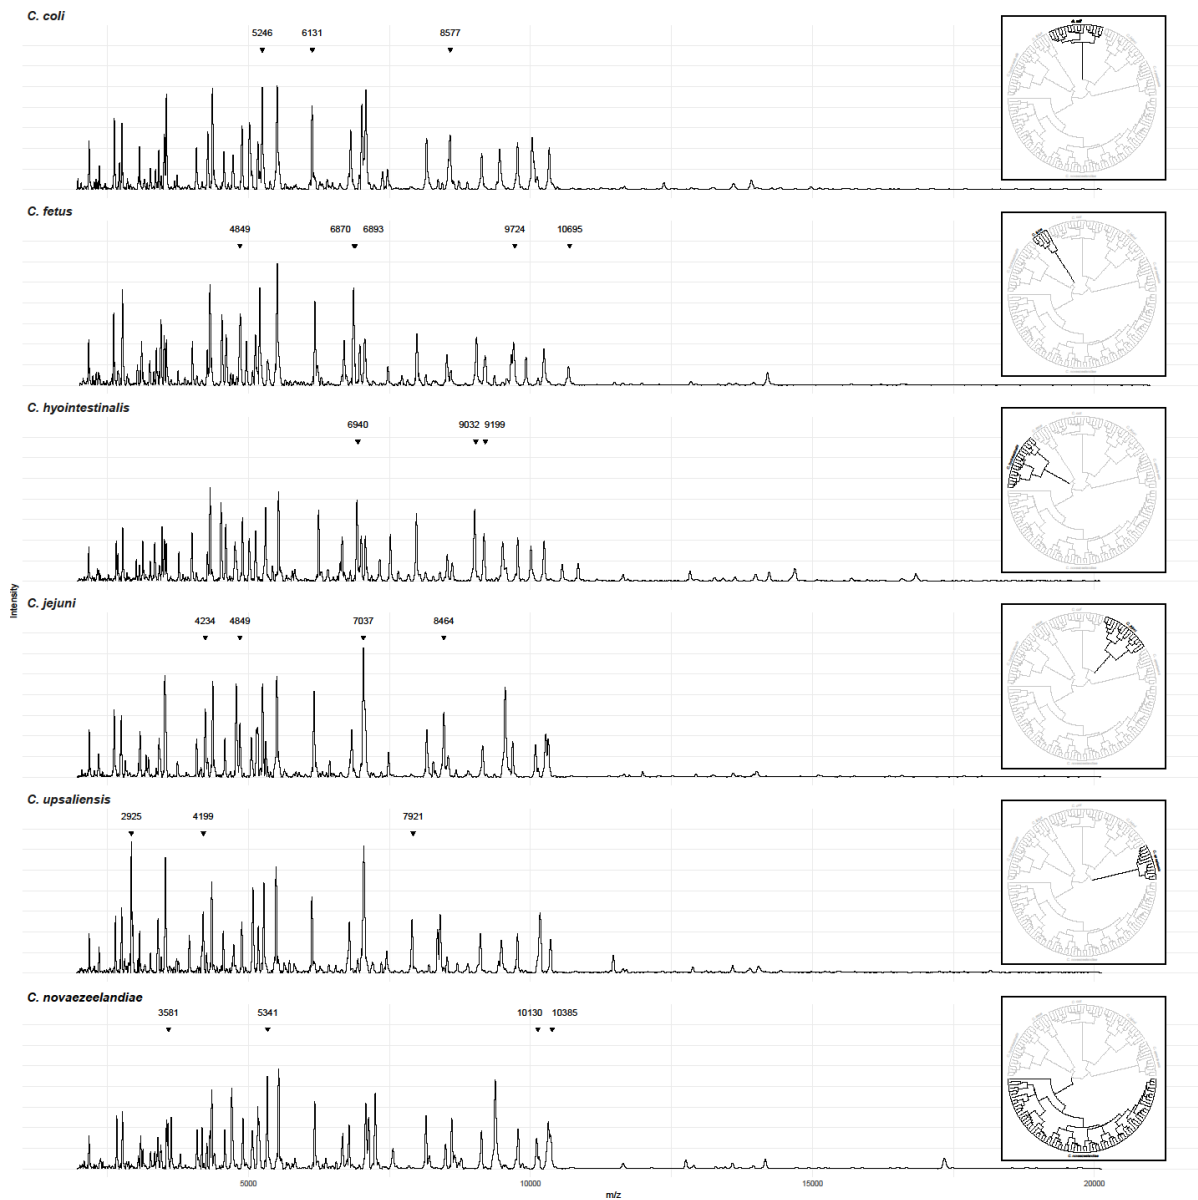

**Figure S1.** Representative averaged MALDI-TOF spectra. Highlighted peaks are discriminant for *C. novaezeelandiae* sp. nov. On the right side of the spectra are proteotyping-based dendrograms with the relevant species positions highlighted.
